# Supplementary material
Source: PubMed Central journal article supplement (PMC4428691)
Supplement: NIHMS676391-supplement-1.pdf [file NIHMS676391-supplement-1.pdf]

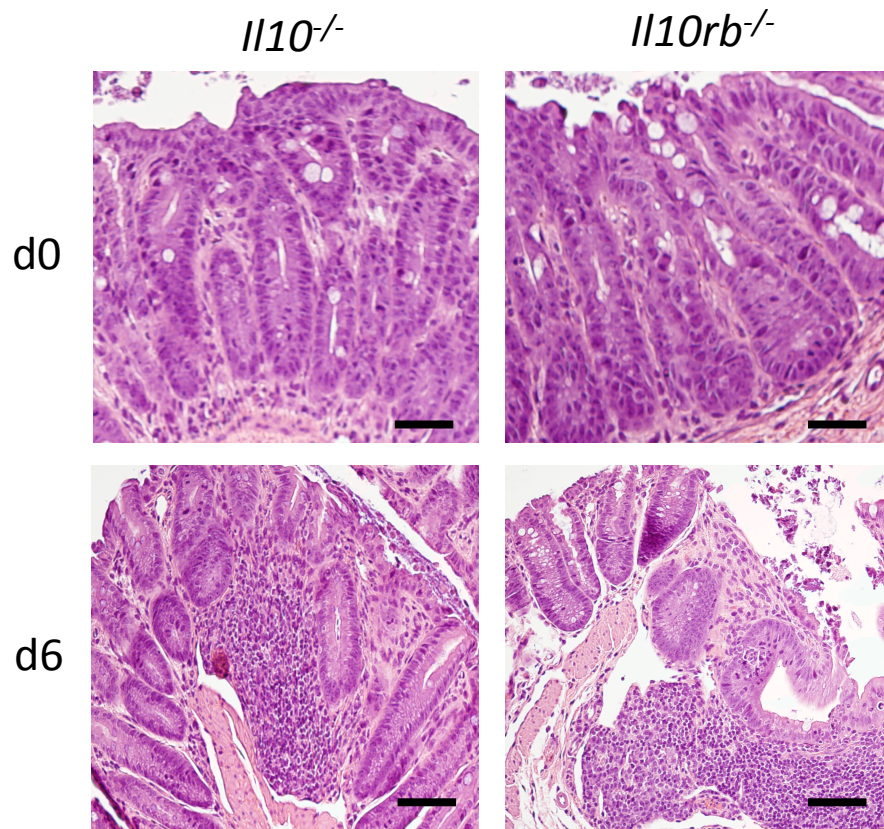

**Supplementary Fig. 1. IL-10 is essential for prevention from colonic tissue damage after *Citrobacter rodentium* infection.** (top) *Il10*<sup>-/-</sup> and *Il10rb*<sup>-/-</sup> mice had no sign of colonic inflammation under steady state conditions. (bottom) *Il10*<sup>-/-</sup> and *Il10rb*<sup>-/-</sup> mice showed severe colonic inflammation at day 6 after *C. rodentium* infection. Scale bar=50μm.

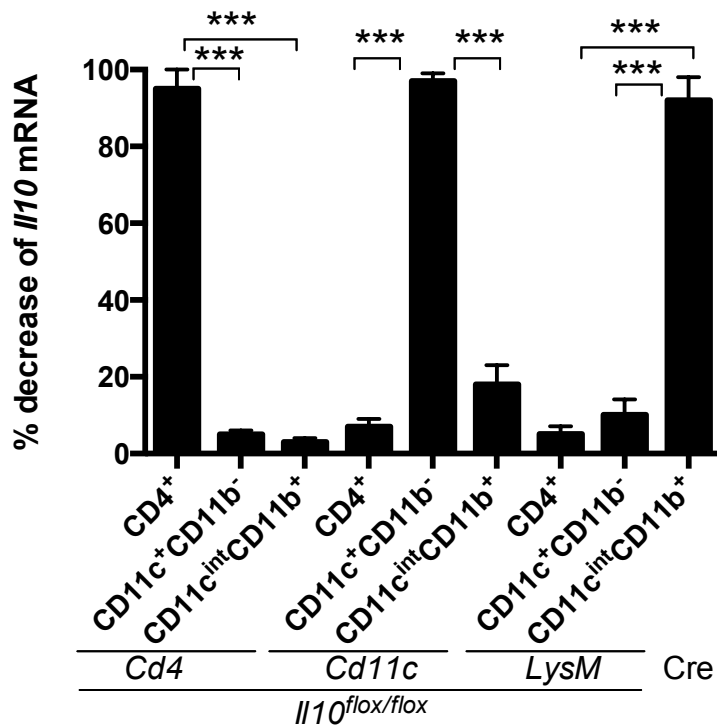

**Supplementary Fig. 2. % decrease of *I10* mRNA transcripts.** CD4<sup>+</sup>, CD11c<sup>+</sup>CD11b<sup>-</sup> and CD11c<sup>int</sup>CD11b<sup>+</sup> populations in the large intestine were sorted from *I10*<sup>flox/flox</sup>Cd4-Cre, *I10*<sup>flox/flox</sup>Cd11c-Cre and *I10*<sup>flox/flox</sup>LysM-Cre mice. *I10* mRNA relative quantities were determined by RT-PCR. Those values were compared to the amount of *I10* mRNA in *I10*<sup>flox/flox</sup> mice. Data are from 2 independent experiments with 3-4 mice per group. \*\*\* p<.001.

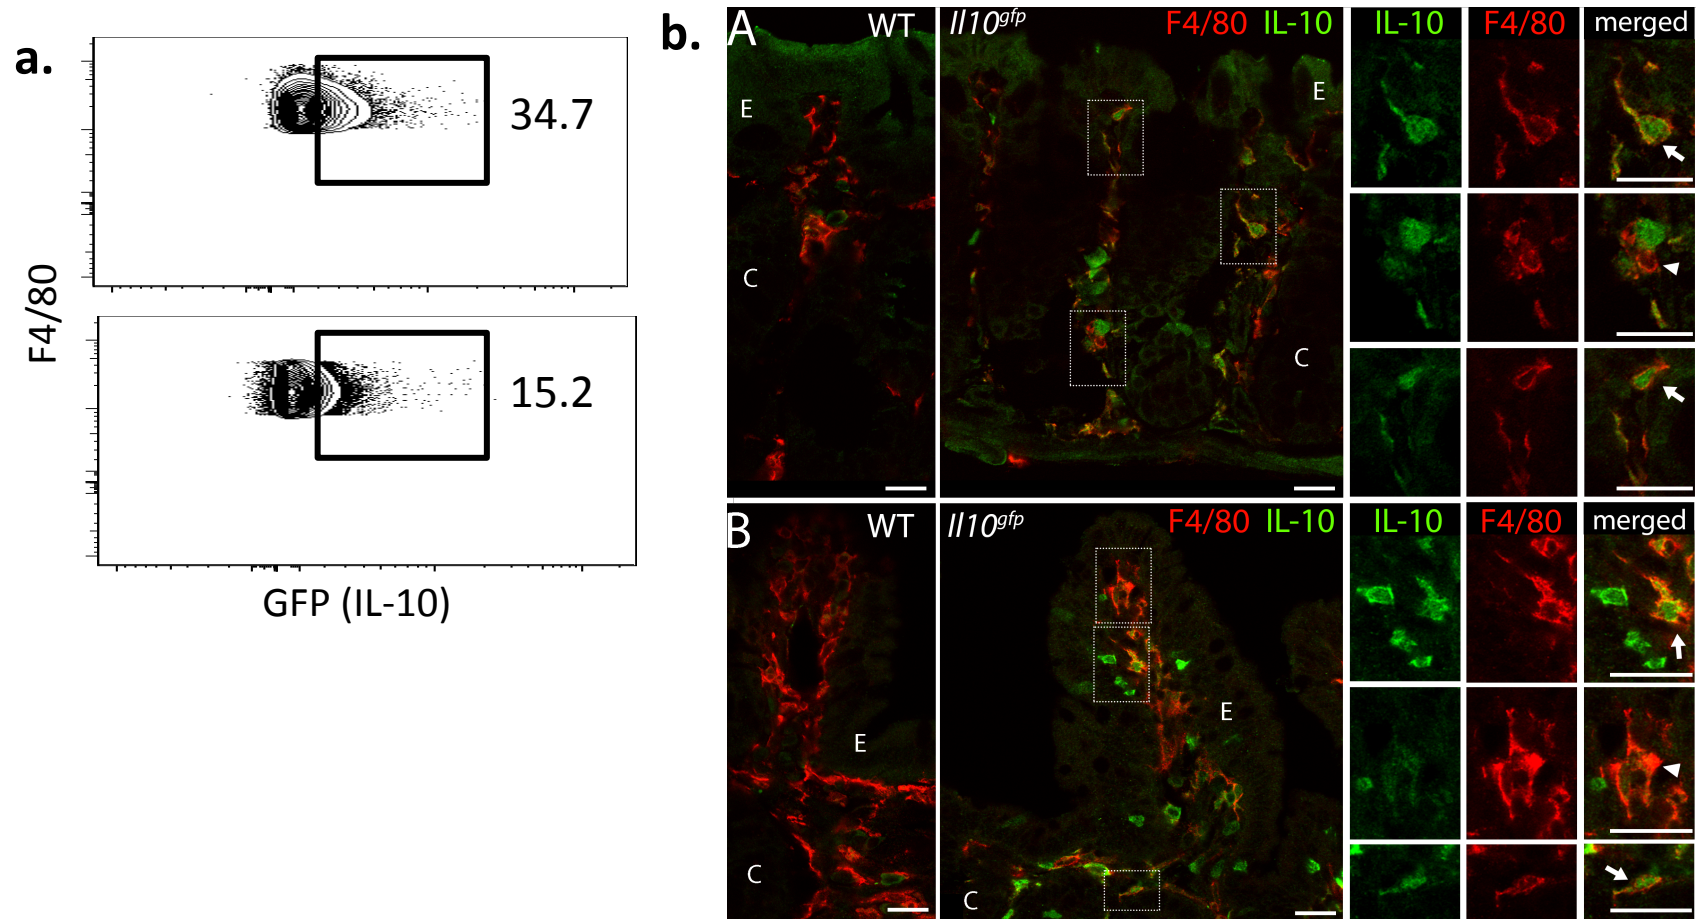

**Supplementary Fig. 3. Large intestinal macrophages express GFP (IL-10).** (a) Large intestinal macrophages express GFP (IL-10) more than small intestinal macrophages in *Il10<sup>gfp</sup>* mice. Cells gated on MHC class II<sup>+</sup> CD45<sup>+</sup> CD11b<sup>+</sup> CD11c<sup>int</sup> F4/80<sup>+</sup> are shown. Top panel indicates large intestine and bottom panel indicates small intestine. (b) Confocal immunofluorescence demonstrating presence of F4/80<sup>+</sup>IL-10<sup>+</sup> (arrows) and F4/80<sup>+</sup>IL-10<sup>-</sup> (arrowheads) macrophages along with F4/80<sup>-</sup>IL10<sup>+</sup> cells in the lamina propria of (A) large and (B) small intestine. E – epithelium, C- crypts. Bar = 20  $\mu$ m

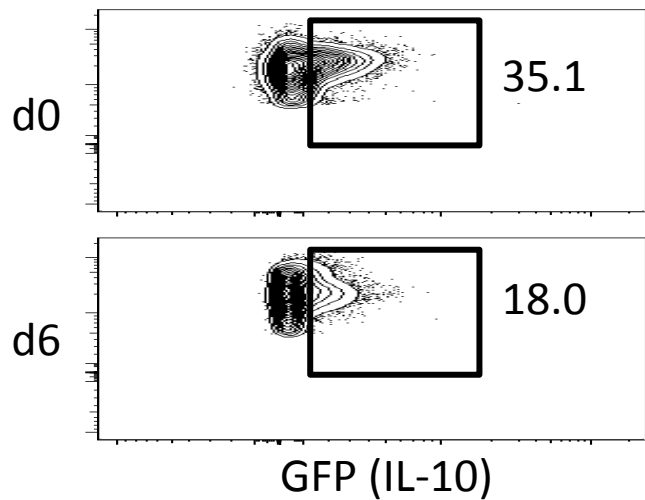

**Supplementary Fig. 4. Colonic macrophages constitutively produce GFP (IL-10).** Cells gated on MHC class II<sup>+</sup> CD45<sup>+</sup> CD11b<sup>+</sup> CD11c<sup>int</sup> F4/80<sup>+</sup> cells from *Il10<sup>gfp</sup>* mice were analyzed before infection (d0) and at day 6 *after C. rodentium* (d6) .

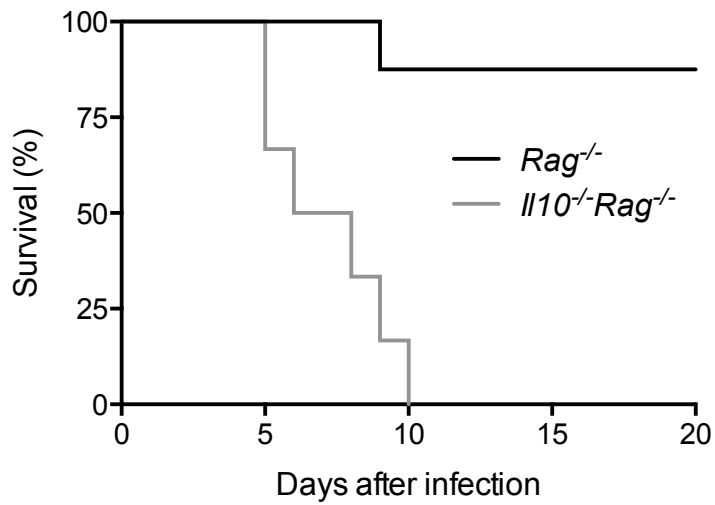

**Supplementary Fig. 5. IL-10 is indispensable for regulating innate mucosal immune responses and survival after *C. rodentium* infection.** *Rag*<sup>-/-</sup> (black line), *Il10*<sup>-/-</sup>*Rag*<sup>-/-</sup> (gray line) mice were infected orally with *C. rodentium* and survival was monitored. Two independent experiments with 6 mice per group .

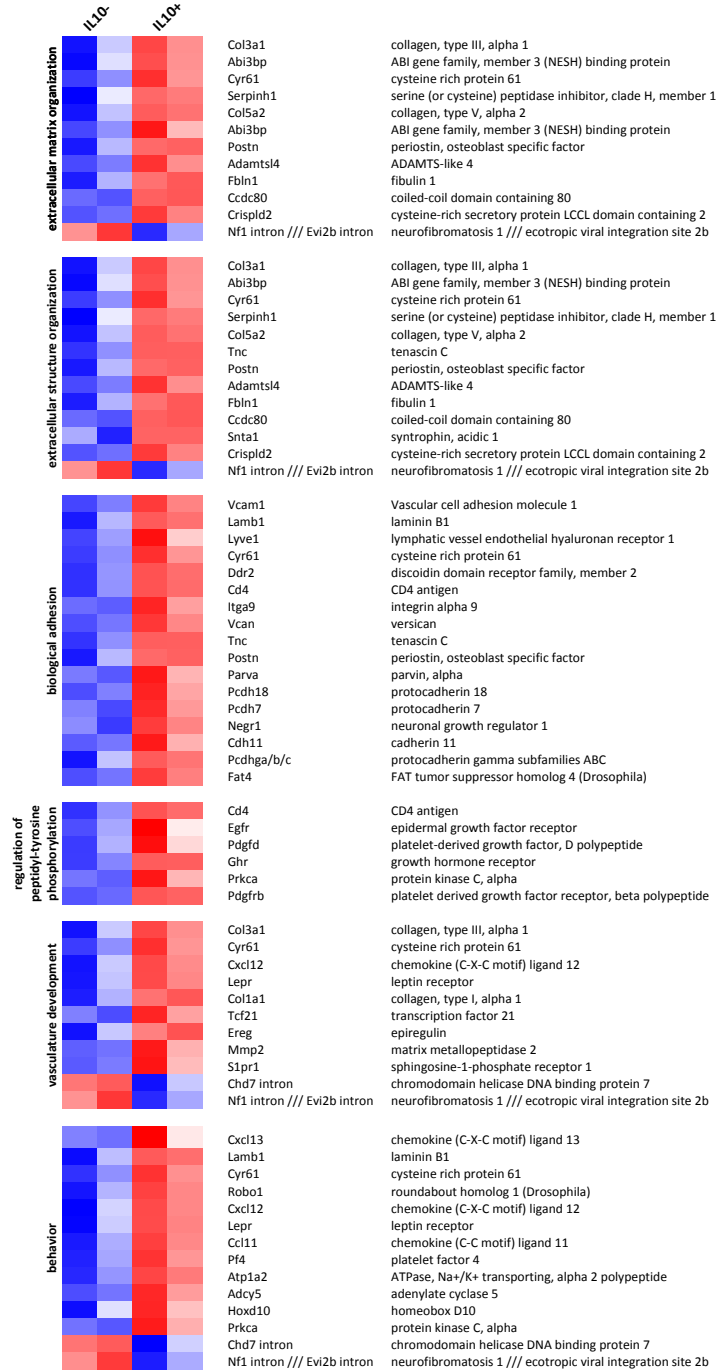

**Supplementary Fig. 6.** Heatmaps showing the relative expression levels of significantly differentially expressed genes among the enriched GO biological process categories as identified by DAVID.
